# Supplementary material for: Genetic evaluation of the breeding population of a valuable reforestation conifer Platycladus orientalis (Cupressaceae)
Source: PubMed Central journal article supplement (PMC5056456; doi:10.1038/srep34821), 2016-10-10
Supplement: srep34821-s1.pdf [file srep34821-s1.pdf]

1 **Genetic evaluation of the breeding population of a valuable reforestation conifer**  
2 ***Platycladus orientalis* (Cupressaceae)**

3  
4 Yuqing Jin<sup>1#</sup>, Yongpeng Ma<sup>2#</sup>, Shun Wang<sup>3</sup>, Xian-Ge Hu<sup>1</sup>, Li-Sha Huang<sup>1</sup>, Yue Li<sup>1</sup>, Xiao-Ru Wang<sup>1,4</sup>,  
5 Jian-Feng Mao<sup>1\*</sup>

6  
7 <sup>1</sup> National Engineering Laboratory for Tree Breeding, Key Laboratory of Genetics and  
8 Breeding in Forest Trees and Ornamental Plants, Ministry of Education, College of  
9 Biological Sciences and Technology, Beijing Forestry University, Beijing, China.

10 <sup>2</sup> Kunming Botanical Garden, Kunming Institute of Botany, Chinese Academy of Sciences,  
11 Kunming, China.

12 <sup>3</sup> National Tree Breeding Station for *Platycladus orientalis* in Jiaxian, Forest Farm of Jiaxian  
13 County, Henan, China.

14 <sup>4</sup> Department of Ecology and Environmental Science, UPSC, Umeå University, Umeå,  
15 Sweden.

16  
17 <sup>#</sup> These authors contributed equally to this paper

18 <sup>\*</sup> **Correspondence to:** Dr. Jian-Feng Mao

19 E-mail: [jianfeng.mao@bjfu.edu.cn](mailto:jianfeng.mao@bjfu.edu.cn)

20 **Supplementary information**

21 **Supplementary Table S1** Characteristics of 87 polymorphic and monomorphic EST-SSR  
22 loci developed for *P. orientalis*.

23 **Supplementary Table S2** Results of Bottleneck test for the populations under IAM and  
24 SMM models.

25 **Supplementary Table S3** Origins of the *P. orientalis* samples.

26 **Supplementary Data S1** The target sequences of the 27 polymorphic loci for *P. orientalis*.

27 **Supplementary Figure S1** Neighbour joining tree. Phylogenetic relationship of *P. orientalis*  
28 individuals.

**Supplementary Table S1.** Characteristics of 87 polymorphic and monomorphic EST-SSR loci developed for *P. orientalis*.

| Locus        | Primer sequence (5'-3')                                | Repeat motif        | Allele size (bp) | Functional annotation | Tm (°C) | HW |
|--------------|--------------------------------------------------------|---------------------|------------------|-----------------------|---------|----|
| <b>Po53</b>  | F: GTCGGGAGTTCCTGAACGAG<br>R: AAACCTCTCATCCCTTCTTGGG   | (AG) <sub>8</sub>   | 186              | no hit                | 54      | ns |
| <b>Po57</b>  | F: ATGGCTTTATTGCATCCGTC<br>R: ACAGAACATAGCATTAAACACCCA | (AC) <sub>7</sub>   | 213              | no hit                | 54      | ns |
| <b>Po73</b>  | F: TTGTGTCCCAGTTCAGTGA<br>R: ATAACCTGGCCATCCAGCATC     | (AT) <sub>8</sub>   | 284              | no hit                | 54      | ns |
| <b>Po75</b>  | F: TGAAGCTTCTTGAGGTAAGGG<br>R: TGAAGAGGCATAATACCGGG    | (AC) <sub>8</sub>   | 142              | no hit                | 54      | *  |
| <b>je52</b>  | F: TCAATTGTCATGGGTCTAGAA<br>R: GGTATCAAAGAACTTGGTGCTTG | (AG) <sub>6</sub>   | 213              | no hit                | 54      | *  |
| <b>je38</b>  | F: CGATGGCATCTTTGACCAAT<br>R: TTTCTTTGAAGTGTGATCGGG    | (AAAG) <sub>5</sub> | 289              | no hit                | 54      | ** |
| <b>Po45</b>  | F: GCCTAACCGGAGGTATAGTTTG<br>R: CACTGCGTGGAAAGACTTCA   | (AG) <sub>9</sub>   | 103              | no hit                | 54      | ns |
| <b>je89</b>  | F: ATCCGGCCAAATAACACAAC<br>R: TGAGCCTCCTTCTTTCTTGC     | (AC) <sub>5</sub>   | 230              | no hit                | 54      | ns |
| <b>je90</b>  | F: GCTCGGCTTCTGAAGGACT<br>R: CACCTTCTGCCATCCCTTA       | (AAG) <sub>5</sub>  | 332              | no hit                | 54      | ns |
| <b>je10</b>  | F: TTCTGTGTCACCTCTGTGGC<br>R: GACGACAAGGAGTGGTGGTT     | (AG) <sub>5</sub>   | 146              | PMT                   | 54      | ns |
| <b>je20</b>  | F: GCATTCATGGACACATACAAGC<br>R: TGAACAAATGAAGGCATGGA   | (AC) <sub>5</sub>   | 236              | no hit                | 54      | ns |
| <b>je69</b>  | F: AGGACATTGAGAAGGCAACC<br>R: TATGCCCAAGGTAAGGAGC      | (AG) <sub>5</sub>   | 297              | no hit                | 54      | *  |
| <b>Po165</b> | F: CCGACACAAACTGTGTGCTT<br>R: AATGGCAGAATGACAATCCC     | (AG) <sub>5</sub>   | 170              | Gp37_Gp68             | 54      | ns |
| <b>Po156</b> | F: CCCAGAACCTCAAACCTTCC<br>R: TTCCGCTATACAACAATACGACA  | (AG) <sub>5</sub>   | 187              | no hit                | 54      | ** |

|              |                                                           |                     |     |         |    |             |
|--------------|-----------------------------------------------------------|---------------------|-----|---------|----|-------------|
| <b>Po103</b> | F: TGGCATAACCTACTTGCATCC<br>R: CTGTAAATGATAAATTAGGAAAGCTG | (AT) <sub>8</sub>   | 275 | no hit  | 54 | *           |
| <b>Po182</b> | F: TCTTGCTCTCAAACCATCCC<br>R: CCCATCATTCCTCAATACCAA       | (AAG) <sub>5</sub>  | 191 | DEC-1_N | 54 | ns          |
| <b>Po161</b> | F: AATTTGTGCGCTTGAGCTTT<br>R: TGTGGCTTTAATCTGAGCTTG       | (AG) <sub>5</sub>   | 118 | p450    | 54 | ns          |
| <b>Po171</b> | F: CTCACTTCTGCCATAAGCC<br>R: CAAGTTGAACAGCCTCAGCA         | (AAAC) <sub>5</sub> | 184 | Mmp37   | 54 | ns          |
| <b>Po159</b> | F: TCCCGATAGTAAAGGAGCCC<br>R: TGTTTAGCGTCAGAAGAAGCAA      | (AT) <sub>6</sub>   | 200 | no hit  | 54 | ns          |
| <b>Po107</b> | F: TGAGAGTAACAGCAGCAGGG<br>R: TAGGCCATTGTTGAGATGG         | (AC) <sub>5</sub>   | 160 | no hit  | 54 | *           |
| <b>Po108</b> | F: ATCATTCTCACTTGTGTCCAGC<br>R: GGGAAAGAGGCTAACTTCGCA     | (AG) <sub>5</sub>   | 244 | no hit  | 54 | ns          |
| <b>Po145</b> | F: AAAGCAAGCATGAGAACCAA<br>R: TCTCCCTCACTCCATCTTCC        | (AG) <sub>5</sub>   | 182 | no hit  | 54 | **          |
| <b>Po114</b> | F: CTCCTGGATATTTATGCAATCG<br>R: TATTGCCTTGTGGTGAGTCG      | (AT) <sub>5</sub>   | 153 | no hit  | 54 | ns          |
| <b>Po152</b> | F: AGATGGAAAGGATATTCACAGA<br>R: ACATCTTCTCCCGACTTCCA      | (AAG) <sub>5</sub>  | 139 | no hit  | 54 | ns          |
| <b>Po135</b> | F: GCTTCGAATTTGCTAGCCC<br>R: GCTCAAATCAGTTATCCTTGCAG      | (AT) <sub>5</sub>   | 190 | no hit  | 54 | ns          |
| <b>Po173</b> | F: TTGAAGGAATGATCAAGGCTG<br>R: CAGACAAAAGAACCACCACCA      | (AAC) <sub>5</sub>  | 161 | no hit  | 54 | ns          |
| <b>Po180</b> | F: CCCTTCTCTGAGCAAACCA<br>R: GGACTGGAGCTATTTGCCTG         | (AGC) <sub>6</sub>  | 126 | no hit  | 54 | ns          |
| <b>jc1</b>   | F: AAAGTTCCATATCTGGCGGA<br>R: TGGTATTCTTGGTATTCTTCTTCG    | AAG                 | 281 | —       | 59 | Monomorphic |
| <b>jc14</b>  | F: TGAGTAGATGAGTGCGGGTG<br>R: GGTTCACCATCTTCGAGC          | AG                  | 292 | —       | 59 | Monomorphic |
| <b>jc15</b>  | F: AGCAGACATCGATGAAGGTTT                                  | AC                  | 284 | —       | 59 | Monomorphic |

|             |                                                         |     |     |   |    |             |
|-------------|---------------------------------------------------------|-----|-----|---|----|-------------|
|             | R: GCCAATAAATTGCATCTCCC                                 |     |     |   |    |             |
| <b>jc25</b> | F: GTGCATGACCTCATTGATCG<br>R: ACTCATTGTTTGGGCTTTGG      | AC  | 161 | — | 59 | Monomorphic |
| <b>jc26</b> | F: CTCCACCGATCAGATCAAGC<br>R: GGGAGAACCCTAAGGCC         | CG  | 244 | — | 59 | Monomorphic |
| <b>jc27</b> | F: GTCCATTGAGTGTGAACCAAG<br>R: GGTAGCTATGCCTCCAACCA     | AT  | 255 | — | 59 | Monomorphic |
| <b>jc30</b> | F: TGCAAACAATTTGGTAACGG<br>R: TGATACTTGGGAGAACTTGGG     | AG  | 246 | — | 59 | Monomorphic |
| <b>jc37</b> | F: CGAGGATATTGCAGACGGAT<br>R: TTCCACCAGGAGTAGCCTTC      | AG  | 299 | — | 59 | Monomorphic |
| <b>jc40</b> | F: CACAATGATCTCCTTTTCATTTC<br>R: AGGTAACTACAAGATCGCGAGG | AT  | 170 | — | 59 | Monomorphic |
| <b>jc44</b> | F: TGGTTTCCTTGAGTGCTTT<br>R: CCATTGTTGAAGATTTAATTGGTG   | AG  | 294 | — | 59 | Monomorphic |
| <b>jc46</b> | F: ATCCAAATGCGTTGTTCCAT<br>R: CCAGAGCAGCTGTAGGCAAT      | AC  | 274 | — | 60 | Monomorphic |
| <b>jc49</b> | F: GATGATTGATTACCCAAAGCAA<br>R: TTGGAGGATATGTGGAGGAAA   | AAG | 242 | — | 59 | Monomorphic |
| <b>jc53</b> | F: GCTGATTGGATCTCAAGCCT<br>R: GGGTATTGAGTGCATGGAGG      | AG  | 185 | — | 59 | Monomorphic |
| <b>jc64</b> | F: AATTGGGAAAGCCTCAAAGC<br>R: TTGCATCCAAATAATCCCTTG     | AC  | 171 | — | 59 | Monomorphic |
| <b>jc65</b> | F: TGAAACTTCTTGAGACCTCCC<br>R: GTTGTTACTGCCTCTTGCCC     | AG  | 250 | — | 59 | Monomorphic |
| <b>jc76</b> | F: GCACTTGAATTGAAGCCACA<br>R: CAACACCCTCAACACCACC       | AAG | 282 | — | 59 | Monomorphic |
| <b>jc80</b> | F: CCAGAACTCCTTCAGTACCTCA<br>R: ATGGAGAATGGAGGATGTGC    | AT  | 299 | — | 59 | Monomorphic |
| <b>jc82</b> | F: TTGTCATGGAGAACTTGGGAG<br>R: TCCAACCCATCAGACTATCCA    | AT  | 292 | — | 60 | Monomorphic |

|              |                                                             |     |     |   |    |             |
|--------------|-------------------------------------------------------------|-----|-----|---|----|-------------|
| <b>jc84</b>  | F: ATTTCACTGCTCTGTGGAGGA<br>R: AATAAGGCCAATGCTGATTCAT       | AAT | 341 | — | 59 | Monomorphic |
| <b>jc91</b>  | F: CTCATTCCAAGGCTCCAGAA<br>R: GCTCAGAAACCTCTCACCCA          | AG  | 327 | — | 60 | Monomorphic |
| <b>Po6</b>   | F: TTCCAGTAATGATCCGTGGAG<br>R: CGTGGCAATACAAGACACAAA        | AC  | 170 | — | 59 | Monomorphic |
| <b>Po17</b>  | F: GCGTTTGGATGTAAACTTGGA<br>R: AGAACCTGAGTTCGTGTGGG         | AG  | 113 | — | 59 | Monomorphic |
| <b>Po52</b>  | F: GTGAATCTTGCATCAGCAGC<br>R: TTCACATGAAAGAGGCATGG          | AT  | 229 | — | 59 | Monomorphic |
| <b>Po62</b>  | F: TGCCTTATGGTAAAGAACCCA<br>R: TGTTGACATCTCAGGCTCAA         | AT  | 212 | — | 59 | Monomorphic |
| <b>Po80</b>  | F: GCTGTGTTTCGCTTACCGT<br>R: ACAGGAGTCAAGATCAGTGAAGG        | AT  | 269 | — | 59 | Monomorphic |
| <b>Po87</b>  | F: GAGCAGTGGTACTGATTCCTTT<br>R: GTAAACCCGTTTCATGTGCCT       | AT  | 249 | — | 58 | Monomorphic |
| <b>Po30</b>  | F: GAGTTTATTGCCTCCCACAAA<br>R: ATTACGCATGCCACAATTT          | AG  | 126 | — | 59 | Monomorphic |
| <b>Po38</b>  | F: ATCTCACCCGATCAAAGCTC<br>R: ATTGTGTAGCGTTACCAAGGG         | AT  | 194 | — | 59 | Monomorphic |
| <b>Po78</b>  | F: CTTATGCTTTACCTAACCATGCG<br>R: CAATCCTTACTTGTAAGCGGC      | AT  | 240 | — | 60 | Monomorphic |
| <b>Po68</b>  | F: AAATGCATTCAAACCAAGCC<br>R: AAGACGAAGACTCTGGTGAG          | AT  | 216 | — | 59 | Monomorphic |
| <b>Po101</b> | F: CCCTCCCTCCTCATATAATCTC<br>R: AGGTAGACATAGAGAATGAATTCAAGA | AG  | 336 | — | 58 | Monomorphic |
| <b>Po104</b> | F: AATAGGTTGGTGGTTGGTCG<br>R: GGCATAGCACCTCTAGCCC           | AT  | 139 | — | 59 | Monomorphic |
| <b>Po109</b> | F: GGTCTACTGCTATCCTTCACCC<br>R: ACAATGAGAAAGGTCCGCAT        | AG  | 217 | — | 59 | Monomorphic |
| <b>Po113</b> | F: GTTGATTGCGGCTCAGG                                        | AAC | 118 | — | 60 | Monomorphic |

|              |                                                     |     |     |   |    |             |
|--------------|-----------------------------------------------------|-----|-----|---|----|-------------|
|              | R: CTCATCAAGTCCTCCCTCCA                             |     |     |   |    |             |
| <b>Po117</b> | F: GTAGCAGGTAGCGCGGGT<br>R: CCTCGACTCTCGTCTTCGAC    | ACT | 191 | — | 59 | Monomorphic |
| <b>Po162</b> | F: GCCCTTTAAACCCAATGCTT<br>R: CGGCGGAGTAAAGTGGTG    | CCG | 133 | — | 60 | Monomorphic |
| <b>Po166</b> | F: GAGCAATCCACACCACCTTC<br>R: TGGATCATTGGTCTTCCCTT  | AAC | 167 | — | 59 | Monomorphic |
| <b>Po168</b> | F: GGATCATGGGAGAATCGAGA<br>R: TGCACTACTCCTTCGGTGG   | AC  | 125 | — | 59 | Monomorphic |
| <b>Po177</b> | F: GTTGGCTGTATTGGGTTGG<br>R: CAGCACTCAACTGATCGGAA   | AGG | 225 | — | 59 | Monomorphic |
| <b>Po178</b> | F: AAGAAATGCCCTCTCAACGA<br>R: GGTTTGAAGTGTATGGCGGA  | ATC | 204 | — | 59 | Monomorphic |
| <b>Po184</b> | F: TTCTCTCCCTCCACAACCAA<br>R: CTCACATGCTGCTGTGGTTT  | AG  | 140 | — | 59 | Monomorphic |
| <b>Po185</b> | F: CTTTCAGTCGCTCCTGCTTC<br>R: CGGTTCCGTTTCATTAGCAT  | AT  | 139 | — | 60 | Monomorphic |
| <b>Po186</b> | F: TTTGGAGAGTTTCTGGGCTG<br>R: CTTCCCTACACTGCACCTGG  | AC  | 192 | — | 60 | Monomorphic |
| <b>Po189</b> | F: TGTTTCCATCCTACCCTTGC<br>R: CATTGGCTTTCCTACCTGGA  | AG  | 126 | — | 60 | Monomorphic |
| <b>Po138</b> | F: GATTCTATGACGACAGCGGC<br>R: TGATGGGTGGTATGATTCTCG | AG  | 115 | — | 60 | Monomorphic |
| <b>Po140</b> | F: CTTCTTGGTGATGTCAGAGGG<br>R: GAAGGAAGAGGAAGCCAAGG | AAG | 185 | — | 59 | Monomorphic |
| <b>Po141</b> | F: GAATTCAAGGAACCATGGGA<br>R: TCCAATGTTGACCAAAGAAGG | AG  | 181 | — | 59 | Monomorphic |
| <b>Po142</b> | F: CCCAACTATCTCCAGCTTCG<br>R: ATTAGTTGTGGTGGCAGGCT  | AT  | 224 | — | 59 | Monomorphic |
| <b>Po143</b> | F: TAGCCTTTGGGCTTATCTGC<br>R: AAAGCATCTTCCCTGTGAGC  | AG  | 239 | — | 59 | Monomorphic |

|              |                                                          |     |     |   |    |             |
|--------------|----------------------------------------------------------|-----|-----|---|----|-------------|
| <b>Po146</b> | F: CTCCGTATACAAGTGGCGGT<br>R: TTGCATCCGTTAGTATTCCAAA     | AG  | 127 | — | 59 | Monomorphic |
| <b>Po147</b> | F: ATGGCATCCTCTTTCCT<br>R: GAAAGGCCACAAAGAAACCA          | AG  | 239 | — | 60 | Monomorphic |
| <b>Po148</b> | F: GTTCTTCTACCAGCGCC<br>R: CAGACCCAGAAATTGTTTCCA         | AT  | 187 | — | 59 | Monomorphic |
| <b>Po150</b> | F: AGTTCAGATTTGTCCAACACGA<br>R: CGCAATTGTAAGGGTTCCAG     | AC  | 153 | — | 59 | Monomorphic |
| <b>Po151</b> | F: TTCCCAATCCGTAATACCCA<br>R: AATGCAACCAGGAAGTAGGG       | AG  | 177 | — | 59 | Monomorphic |
| <b>Po153</b> | F: ATCCGACGACCTTCTGAGC<br>R: AACACGCTTGACTTCCCTTG        | AGG | 178 | — | 60 | Monomorphic |
| <b>Po154</b> | F: ATTGCTTCCGTACAAGGCAC<br>R: TGAGAGGCTCACAAAGTTACCG     | AT  | 164 | — | 60 | Monomorphic |
| <b>Po155</b> | F: GGATTGTTGGTTTCATTTGC<br>R: ACCAAGTTGCTAGAGACGCC       | AG  | 170 | — | 59 | Monomorphic |
| <b>Po157</b> | F: TATCCCGGAGAACAAATTGC<br>R: CAAGTGACCATGAGTGGAGC       | AG  | 176 | — | 59 | Monomorphic |
| <b>Po158</b> | F: AAAGAAAGCGAAGAGAGGGC<br>R: CAGTGTGCTTCTTCTGCCTG       | AG  | 173 | — | 59 | Monomorphic |
| <b>Po102</b> | F: TCTCATAAAGGTACAATGCATACACA<br>R: TACAGCAGCGTAGTCCCATC | AT  | 350 | — | 59 | Monomorphic |

31  
32 The locus names with “Po” indicate the locus developed from the transcriptome assembly of *P. orientalis*; the locus names with “jc” indicate the locus  
33 developed from the draft genome assembly of *Juniperus communis*. Protein family annotation are prepared by querying the protein family database,  
34 Pfam<sup>1</sup>; HW: ns = not significant, \*  $p < 0.05$ , \*\*  $p < 0.01$ , \*\*\*  $p < 0.001$ .

35  
36  
37

1 RD, F. *et al.* The Pfam protein families database. *Nucleic Acids Research* 28, 263-266(264) (2000).



38 **Supplementary Table S2.** Results of bottleneck test in the 3 populations under IAM and  
39 SMM models.

40

| <b>Population</b> | <b>IAM</b>   | <b>SMM</b> |
|-------------------|--------------|------------|
| North             | 0.784        | 0.997      |
| Southwest         | 0.278        | 0.839      |
| East              | <b>0.014</b> | 0.326      |

41

42 IAM: infinite allele model; SMM: stepwise mutation model. The significant value was indicated in bold  
43 type.

44 **Supplementary Table S3.** Origins of the *P. orientalis* samples.

45

| <b>Population</b> | <b>Forest stands</b>                                | <b>Sample Size</b> | <b>Longitude (E)</b> | <b>Latitude (N)</b> | <b>Accessions</b>                                                                                                                                    |
|-------------------|-----------------------------------------------------|--------------------|----------------------|---------------------|------------------------------------------------------------------------------------------------------------------------------------------------------|
| North             | Linxian, Huixian, Weihui, Huojia, Boai, Jiyuan      | 136                | 113.51°              | 35.42°              | 54-69, 71-73, 76-86, 89-95, 97-124, 126, 131, 133-151, 153-161, 163-165, 189, 190, 193, 196, 198-200, 215, 232, 43, 245, 246, 248, 250-253, 274, 275 |
| East              | Jiaxian, Xiangxian, Wugang, Leshanlinchang, Biyang  | 21                 | 113.43°              | 33.33°              | 1, 3-11, 18, 20-25, 174, 177, 206, 209                                                                                                               |
| Southwest         | Yiyang, Luoning, Luanchuan, Luoyang, Longmen, Linru | 35                 | 112.17°              | 34.36°              | 13-17, 26, 27, 29, 30, 32-36, 39-45, 47-53, 178, 180, 181, 188, 192, 202, 212                                                                        |

46

47

48 **Supplementary Data S1**

49 >Po53

50 AGGGTGTATTTGTTACAGTTCAATAATTTGCCATAGAGAAGAACCAATTCGTTTGAGGATAGAGTGTGCTCCCTATATTCATCTATAGGAGGATG  
51 TGAAGCTTGATCCTTGTCCGGGAGTTCTTGAACGAGGAGATCAAAGTTAGGGCCCCTTTCTTATTAGGTTGGTGTCTTCCATGAACAATGGTGCC  
52 CCTCCTCCAGActctctctctctctACGTCATTGGCATTGTACAACAATCAAATACTTGGGAAATCTGAAGTGGATAGATACTACCCAAGAAGGGATGA  
53 GAGTTTATCTATTTTGTCCATTTTGTCTTTGGCTGGCTGAAAGCCATATAATTCTCTTACAATGGCCCTCTGTGAGAGGGTTGCTAATCTTTTCCA  
54 TCATGGATAAAATGGTGATAATACTAGGAT

55

56 >Po57

57 TagagagagGGTTTATAGTTTAGCAATCGGAAAGCTAAGGTATAGTGTGTGAGGAGGtttttttGAGAGTAAGGGTTTCTAGTTTAGCACTCAGAAAG  
58 CTAAGGTATAGGGTTGTGAGGAGGTAAtttttGAGAGTATCGCTGATAAGATGTGCTATCCATGTTCCAGGATGGTAAAAttttGATAAGGTGTTCTATG  
59 GCTTTATGCATCCGTCTCCGGAATAATTTTCATCTGCATCGGTTTTATTGAATTTGGAATaaaaaaCgtgtgtCGTTCCTAATGTCGTTTTGGGTCAGGA  
60 ATATTAATTTGTCTCTGGTTATCGCtttttAAAATTGTAACCGGCTTAGTTTTGTcacacacacacatatataGTTTAATTTGGGTGTTAATGCTATGTTCTG  
61 TCT

62

63 >Po73

64 ATaaaaaGGAAGTAACGATAGACTTTGTTGTGATTCTATTACTTCCAAAATATTATTTTCGAGTGGTATCTTTTGTGGTTGTGTCCCAGTTCAGTGGA  
65 AAACATTAATTGTTAGTATTGTACTGGTGATTACTTGAAATCTCCCACAGAAATCACTTTTAGGATGGAGACTTGTTAAAACATAaaaaaTACAAGT  
66 TGGTTGGTTATGCTTGTTTACCATCAAAGGTAGGAATCACCACACtatatatatatataGCTTCAGTTTAAAAGAATGTCAATGAGTCAATACCATCTAG  
67 TGAGCTATGTACCTCAGTTTAAACAGGATTTTAAtttttCCGGTTGATGCTGGATGGCCAGTTATGTAATGAACACAAGTTATCAAATCATTGTCATTG  
68 AAACGCTGTTAAAATGTTTT

69

70 >Po75

71 CTGAAGCTTTCTTGAGGTAAGGGGTTTTACTCCTGTAAATAGTTGTAATATAATTTTGTGTGCTTGAtttttGgtgtgtgtgtgtgtGCCCAGTGGCTCCTC  
72 TGctctctGCAAGCGACTCCCGGTATTATGCCTCTTCATGACTTTATGCCCTATGGATAAAGCACTGATCCACTTTCTGAGTTCTGGCATTCCCTTTAT  
73 TCAGAGCCTATGTTTTCTTTAAATAAGGTTGCAACTGTTTCCCCTTTTAAATTTGGTTTTTCAGTTCAGAGATTTGCATGATCAAAGTTCCCAA  
74 CCAGTCTAAAGCCCAATTACTCCGCTTTCCGGTAAGCAAATCTGATAGGGTCCAAAcccccTATGCCCGAGTCATACCATTCAAGCAAATTCCTGAT  
75 ATTGAATAAACCAAGTTTGACC

76

77 >Jc52

78 GACTACACTACTCGTAATAATATCTCCTTCTTTTCATGCTCATTTC AACAAAATTTCTGTCTAGCTTTCAACTTTAGCCCTTAACACAAttttGTCTCC  
79 TCAACAAAATTTGTGCCAACTTATCCCATATCTTCTTTGTAGTAGTGTAATCCTTCACATCATAAAAACCTTAGCACACTTAACTTAAAGGAAGATGCCA  
80 AATCTATCTTCATTTTATTTGTTTCTGCTTCTCTTTTATTTTCTCAATTGTCATGGGTCTAGGAAATCTATGTATTCATTGTCTAAATAGTATAGTA  
81 GAGATTCTCCAACCTTTAGATAGATGCAATCTCACTAGATGTTTCCATTGTAGGATATTTCTTTGTTCAACTTGGCTACcctctctctctTGAATATCTTT  
82 ATCTTTAGCTTAATTCCTTCAAATTTCCCTTACAAGCACCAAGTTCTTTGATACCAATTGTTAGAATGATTAGACTAAC

83

84 >Jc38

85 GACTACACTACTCGTATGTCTTCACAAGGTTGAACAGCGACCTCTAtttttGCGATGGCATCTTTGACCAATAGTATGTTGgagagaAGTTAGTATGAG  
86 TGTAATGGGATGAATGTAGTCAAGAAGTTGTCATATCAATCAAACCTCTTAGGTACAGATGATCAACTCCCTCAAATACCATCTATCAAAACAGCT  
87 AAAGGAATCTTGGACATCTTGAAGGATCTTTACGAGATATCCATCAAGAttctttctttctttctctATGACCAATTAGAGGCTATTGGCCGCAAGATAGAG  
88 GAAGATTACAATGAAAAGCTTGCCCGATCACACTTCAAAGAAATGCCAATAATATCACTTACACTAGTGTTGCCCTAACATTCTCTAATCTTTG  
89 CAACAAGCTTCTACAGCAAGATAGATGGAAGGAACAGTTTGGAAAGTTATG

90  
91 >Po45  
92 TAATGCCAAACTTGGTCAAAATGCCTAACCCGGAGGTATAGTTTGTGATATGAGAAGCTATGCACAGCTCctctctctctctctctCATCCCCATTGATGGC  
93 CATGAAGTCTTTCCACGCAGTGATGGTGCCATTCCCTGTCCAgggggCAATCAATCCTTTTCATGCAATTGGCCACCTtctctcCGCAAGGGGATTCTT  
94 CATCACCTTCGTTAAACTGAGTATTGCCAACGCCGCATGGTAGACGAGGCTGGACAAGCAGAGGGGTTCCGGtttttGACTGTCCCGGACGGCC  
95 TACCGCCAGAGCATGGCCGTGAGCATGGCCGTGTGATGATCTTGTCAACTATTTGATTGCACTGGAAAATCTAGCCCCTGTTTTGGAGAAGCA  
96 TCTGCTTGCCATGACTCGTTCGGAGGA

97  
98 >Jc89  
99 GACTACACTACTCGTAAGGGTCAAAACCATGTCAAACAACAGAGGATAATAGACGAGGGGAGAAAAGAGTAACAACACCACCTTGACTAGCT  
100 TCATGCTGAGAAGCaaaaTGGTACTATCCGGCCAAATAACACAACAAGATGAGGTAAGAAGAAACCCAACACTTTAACTTCCATAAAGGTAAA  
101 GAACATCAAGATCAAATCAACATTTGGTATcacacacacaATATTTTCTAGGGAGGTCTGTGAGccccATTCCATGACATGCAATTCATGGTAACCCAA  
102 CTTGCATGTATCCGCATCCCCAagagagGAGAAATTGTTATGCAAGAAAGAAGGAGGCTCAAAGAGGGGTCATCAAAGCTGTGACCTTTCA  
103 AAGCTTCTCCCCATTATCaaaaaaCTCTTCTCGGCCATCTAGGCTACTAGACCAGCATAGCTTCTATTGGTCTATCATTGACACCCTTGCGGCTCTT  
104 GGGTCCAAAGAGGAAGCAGATCTCGAGTATGAACAACCATTGTCCCCTGACCTCCAGGGTTTGAAACANGAGGCAAAGGGAGCACTGGGAA  
105 CTGGGGCTTCATGGGGAACCTGACTTGAGCTAGATTTACCAT

106  
107 >Jc90  
108 GACTACACTACTCGTAACTTGAGCCTAGTGCTAAGATTTGCAGTGGTATAACTTTAGTGCTCGGCTTCTGAAGGACTTTTGTAGGAGAGCCAGA  
109 TGTGGTAGAGTTACCAATTCTTAAATGGCCTCTTATTCTCTCCTTTGGTATGTCTTATTTTCTTCAGATCTACCTTGGTTAATCACCATGATCT  
110 AACTTGTACCTTATGTTTGTACATCAAGTACAGATGCATCTATTTGTCTATTTGTTCTTTTGTAGTCTTctctctctctctctTTCTTTTGTTTAATtatataAA  
111 ATCTAACAATTGTGTCAACCTTTGTAGATGTATCTTCTAATGTTTGTATTAAAGGTTGAGCACCAATAGCTAAAGGGATGGCAGAAGGTGGTTCT  
112 TGTGTATTCACCTTATCCCTTGTAAATGTCAGCTACTACCTTCTAAAGTTCATCAACACTGACCAATATTGGATTTTcacacaATCTGGCTTGTAGTGT  
113 GGATTGGTCAAGGATCTTCTTTAAGGtttttGAGTTT

114  
115 >Jc10  
116 GACTACACTACTCGTACTTACACCCGTTCACTATTTCCAGAACTTTCTGTCCATCCAGCGTCCATAACTTGATTGCTCCATTATTGCCTACTTCCT  
117 GAATCTGATATGCCCCAACCCACTTAACTTTGAACTTTCCAGGTTTGTATCTATTCCAGCCGTCGTACTTCAACACCCATTGTCTAGGTTGGAAC  
118 CTGTTCATTTTCAAATGCTTATCGTGCCATGCTTTTGGCCTGTTCTGTGTACCTCTGTGGCCCACTATGCCTATGATCGTCAAGTTTATTTAA  
119 GTTACACGGtctctctctcAAGTTTTCCATATCGCCCAATTTGTTCCCGATACTCGGTACCATGAATTTGTTAACCACCACTCCTTGTGTCGTAATAACT  
120 GTATTCTTGATTTTAGAACCCTTCACTCCGATTTGTTGCAGCTTCTATTAAACCCTTCTCTTTGTTTCCCTATGCAGATCGTATGATGTGCTTCCTT  
121 GCTGCCGG

122  
123 >Jc20  
124 GACTACTACTCGTTAGATACATGAATCCAGATTTGTATGCGTGAATGTATGTATGCATACatataTTCAATATGCACATGTTTCATACATAAATACAT  
125 AGATGAATGGATTTGCACatataTCACTCATTTCGATCatataTCATAcattcattcattCAATCATAACATTCATCCATACCTTCATACCTTCATACATACATCCAC  
126 ACCTTTATTCATTCTCGCCTTCTTGCATTTCATGGACACATAACAAGCATTTCATTCATACATACCTTCGTATCTTCATAAATGCATCAATATACACATTC  
127 ATGCATTTATAATGTATTTGTATTTGTACATGCATGCATAGATACATGTAGACATGCATATAGCTACCTATCTATCTTTACATACATGAATCcacacacaca  
128 TACTTCCATACATTCAGTCATCCTTGTATAACTTTTTGCGTCCATGCCTTCATTTGTTCAAGTCATTAATCCATACCTCCATACTTATGAACATTCAAT  
129 CATACCTTCATTATTCATCCATACATTCATTCCTTATTCA  
130  
131 >Jc69  
132 GACTACTACTCGTTTGTATGATTTACATGGGGCACCcttctcttCAAATAATTTTCTATATGGATACCATCATATCCATATgagagaAGAGGACATTGA  
133 GAAGGCAACCTTCTGATGTCATGACTATGGCCACTTTGAATTTATGGTTATGCCATTTGGGCTAACCAATGCACCCACCACATTTAGAGTTGTATGA  
134 ACTAGGTATTCAAGAGGCAATTGAGGAGATTCATCTTGATCTTCTGTAATGACATCTTGGTCTTAAGTAAGACATAGGAGGAGCACTTAGAGCA  
135 TCTGGAGGAGGTGTTATCTATTCTagagagagTTATTGTATGCCAAGGAATCTAAATGTGAATTTGGCATAACCAAGCTCCTTTACCTTGGGCATAT  
136 CATTAGTGCAGATGGTGTTTGAGTTGATACTAAATAGATTAGAGCTATTTTAGATTCACCTACTCCCACAAACCTcacacaGCTTAAGAAGATCTTT  
137 GGTATTATGTG  
138  
139 >Po165  
140 GGAGTGaaaaGAAGCCAGGCATTAGTTGGATTATGACCaaaaTAAGGTGCATACTTTTGTGGCAGAAGACAGATCCCATCCTCAAACAGAGGAG  
141 ATCTATGCAATGTTGTCTGctctctctAGaaaaTGGAAGAGGTGGGTTATGTACCCGACACAAACtgtgtgCTTCATGAAATGGATGAGGACACGAAAGA  
142 ACActctctctTACCACAGTGAGAAACTTGCTATATCTTTTGGTCTTATTGCGACACCCGCAGGGACGCCATCCATGTCATGAAGAACCTTCGTGT  
143 TTGTGGGGATTGTCATTCTGCCATTAAGTTTCATATCTAAGATTGTTGGTCGAGA ACTTGTGTAAGGGATGCCAATCGTTTCCATCATTTTAACAG  
144 TGGGCTCTGCTCGTGTGG  
145  
146 >Po156  
147 ACCCAGAACCTCAAACCTTCCTTTAAACCTTCCTTTTGTGTTATaaaaGACAATTCATAAAGAATAATAGCATTAAATCAGTTCTTTTAAATAG  
148 ACATagagagagCAGCAAATACAAATCAAGGAGCTGAGAATTTCTTATACTCCTCGCAAAACTAGATGTCGTATTGTTGTATAGCGGAAACACC  
149 AAATCCATGTACACAGT  
150  
151 >Po103  
152 AATGTTTTGGATCACACTCTATGACTCTATGATCCATCATCAGAACAAGAGTGAAAGGAAACATTAAAGTACTGAAATATGAAATATGAAATGC  
153 AAATTGGGACAGTAAAGTTGGCATAACCTACTTGCATCCATGCTTTTGGAAAGCATTAAATCCCATACTTAGGGAAATATTGAGGCTCAGAAAAT  
154 CATATTATGAGAGTTGGATTTAAAGTAAAAGCaaaaCAATCAATTCACCTTCCATTCCAAAAGAAACAAACAGATTTTCTATCTGCTGTTCCATTT  
155 AATAatatatatatatGGTCATAATGAATGTCCTTGTTCttttCTCAACAAAACACGAATaaaaTTACAGCTTTCCTAATTTATCATTTCACAGCAATTA  
156  
157 >Po182  
158 TCCGGGAAAGCACTAGCGGTTACGACACCGTCCATTCAAGCCATCTTTACGTCATTACGACCTCCTCAAATCACatataTCTTGCTCTCAAACCAT

159 CCCAGTGCAATTATTTCTCTGCTTTACGCGCTGTTTGATTTTGTGTTATTTCTCGGCAAAGGAAATTTAAAAGCCTCAAGCTTTTAGATTGTTTTAG  
160 GTCCAGGgaagaagaagaagaaGTTATGGCTAGAATCAATGAAGTTATGGCCATTCTTTTGGTATTGGGAATGATGGGGCATTCCACTGCGCAGGCTCC  
161 TTTAGGTTCTCTGTGGCATCGCCACAACGTCGCCGGTTCCAACCCCGGCAAAGACACCCAccccTCTGCACCTCCAGCGTCCTCACCTTAC  
162 CTGTTGCTTCCCTCCCCTGCAGTTGCACC  
163  
164 >Po161  
165 GGATCATACTGGAGAAATACCAGaaaaTTTGTGCGCTTGAGCtttttCTTCTAAACAGCTCCAAACATTCCGGCCCAagagagagagGGAGATTTGTAAG  
166 ACTCTTAGTATTCTGTTTCAACAAGCTCAGATTAAGCCACAGTTAATATGAGAATTGTTTTGTCTCAGATGACATTAATGTTATGATGAGCATG  
167 ATAATGGGCGATCAGTGGTTTTGTTGAGGAagagagCATGTCCTGCGCAGAAATTTTACATCTGATTGAAGAGTCTTTCATGCTCCATGGgtgtCAAT  
168 GCTGGAGATTATATCCCCTGCTGAAGTGGTTTTGATTTGCAAGGGT  
169  
170 >Po171  
171 GGCTCCTCGTTGTTGACAATGCAACCTGGCTGAGGGAAAACCTCCAGATCCATATGCACACGCAAATTTCAACAGGCGGCATTTGTTTTAAGAGGT  
172 TCCGCTAATTCACAATAAGCTCTTCGCTGACTTAGAAAACCTCACTTCCTGCCATAAGCCCTAAACCCTAGTAACGCCGATACCCTGGGACAA  
173 ATCTTCTAACAAGcaacaacaacaacaCTATTTTCGTTGATTTAACATGTTACTTCTAGTGTCATCTGAACCAAGCAGCTAAGATAGCACTACGAT  
174 GGAGAAAACCTGCTGAGGCTGTTCAACTTGTTCGGGCACTTCGGTAAATCGTAACACTGTGATAATAGGTACTAGTCGCCTGGACATCATTGA  
175 TCAGAAGTTCGATTTTCACTGCTATTAGAATTGGCAA  
176  
177 >Po159  
178 ATGAGTTGTCTCCCGATAGTAAAGGAGCCCGATCATAATGAAGGCTACCGATAATCAATGAAACTTGATCACAGTATTTGCTGATAATCCATATAA  
179 TATTGCAAGGATGTAGGCatataatataatGCTTATATCCATGCGATTTATGGAATCAGCAGTAATTTCCAGTATATCAAGTAATTCATGTTTTGCTTCTTC  
180 TGACGCTAAACATTAACACTCCCTCTTTAGCTAGGAAGAAGGaaaaaaCATCAATAGGTCAGAATCATCATATAATCAACACAATATGAACAGTAC  
181 ATGGTATATCCAATGATCT  
182  
183 >Po107  
184 TGTGCAACAAATTCAAAAAGtttttCTTGCAGATGAGTGacacacAAGTCAAGTCTGCAAGAAATCTCACAAGATTGACGTGAGTTTCAAAAAGCTAA  
185 CCTGGAAAATTTCAAGCAAAGACTTGGCTACTGAGAGTAAcagcagcagGGGTTTCAACACCtttttCCGCCATTTTGTCTTTGGCAGGTGCAATCAG  
186 AGCAGATTGGAAACATacacacacacATACGCATGCACGCACACGcacacacaTCCCCTTTGTTGTCCCCTGCCATCTCAAACAATGGCCTAAAACCTCAC  
187 ATCCCCAAAACC  
188  
189 >Po108  
190 GGTAAACAGGACCGATAACAATCAGAACAAATAGATTCATTTTACTACTTCTGGTATAAGCTTAAatatCTCAAGCCAGTGATACTCTTAAATTAT  
191 TTCTGCACTTGCACCTCAGTtatataTCCTCTAGtttttCTGGTTATAGGTTTCATGGATATCATTCTCACTTGTGTCCAGCTACCTTGCCCTGTGGTTCAAT  
192 TAAGGTGGTCTTACAGATTTCTAATGGCAGAGGACATACCTGATTTTAAAGTTATGTCCGGTGTCTTTAAGAGTAAAtctctctcATAAGGTAAATTTCGG  
193 AGATATTTACTCATTGTCAAGACACTAGCAAAAAGTTGATTGTATGAATTAATAGTTTCATCGGAAGCATCTAAATGACAGATGCCAAGTTAGCCT  
194 CTTCCCCGAACCTAGC  
195

196 >Po145  
197 AAAGCAAGCATGAGAACC AAAATAAAGGTGACTCTaaaaCACaaaaGGAGAAGAAATAAGAAGCAAATAAATATGAAagagagagagATAAACTAA  
198 AATAAGAGaaaaTGAAAACCCAAagagagagaaaaagggggAGAGGGGAGGAGCACAAGAAGGAAGATGGAGTGAGGgagagaCAACATAGaaaaCAA  
199 AGAAACTAGAgggggg  
200  
201 >Po114  
202 CGCAGTTCTTGATCATCCCGATAATCAGTGACGaaaaTGGCTCGGAATGTGTCAAAGTATTAATGAATATCTTATTCtttttCCTAATTTACCTAAAG  
203 CTCCTGGATATTTATGCAATCGTACACAAttttCTGGTTTTCCAAAAGGTCCtatatatataAGCAATCTTACTCAAtttttCTAGtttttATAAGTTCCGAAatatatAA  
204 GCATTATGGGGAGCATAACAAGCGACTCACCACAAGGCAATATCAGTAATATCGCAGATACGGC  
205  
206 >Po152  
207 GGCAATTAGGCTTTATAAGATGGAAAGGATATTCCCAGATTAGTAGACTGTTCTCAAACAGTGCATATGGAAGACATGGCCTGCaagaagaagaag  
208 ATGATGATATAGAAGATGAAGttttAAGGGCTTCCATGGAAGTCGGGAGAAGATGTCTAGTGAAATTGGCTATGGGGCTAGTAATGAGGATAAGT  
209 TCGAATATGATTACGAGCATCCAAGAGTCAAGGAAGCTTGTAGGCTCATTAAATTGCAGCATATGTGGGAGACACCGCTTGAAAGGGACCTCA  
210 GGCGCACGGTTCGCAA ACTA ACTCCTCA  
211  
212 >Po135  
213 GTTTGCTTCGAATTTGCTAGCCCAAGTATGTATTTAAGGGCTGCATCAATATCAGCCCTACATCAAATATCGATGTCTACTtatataTCAGATTTTGCT  
214 GatatatataGCTTCAGTTTGCTTCCCTTGAATCGCACTTGTACTGGCTATTAATTAGGTGATGATAAGGACTGCAAGGATAACTGATTTGAGCATATT  
215 GAATTTGCC  
216  
217 >Po173  
218 CCTTGGGTAATTATTTtatatatataatataACAAATCCCTGTAAGTGAGACAAA ACTGAGTAATACAATACCACAGTTCTTGTATGAAAtttttGCATAAAAT  
219 TTAAATTTATTGCTGATGCTTTATTAGAAGTTTGAAGGAATGATCAAGGCTGTTTCTCTGTGTTCTGATATAACTGCACTGTAAACTTGGTTTTctgtt  
220 gttgttgAGTAttttGTCagagagATaaaaTAGCTGCTCACTTCCCTTtatataTGTCAAA ACTGAGTAAAtggtggtgTTCTTTGTCTGTCATTGCACTAttttGTCACA  
221 GCTACAGAACTAGtttttAACTATGCTTCCCCTAGTGT TTTGGGATGGGGATGGCAGGAGGCAATGATCATGTAAAAGAAAAGAAAtttttttt  
222  
223 >Po180  
224 TGCCATGGTACAAGCATT TATTTATAAAatatatGAAGTCCTGCTACTGCAGCTTCTAAGTAGTACTACCTTTAGCTAAGAAAGAGGATTAATAATAG  
225 AGTCCAAATGGGCTCAGCCTTTTATCCCACCATTGATGCACTGCAACACCCCTTTCTCTGAGCAAACCATAGAGTGCCAGGCACTCCCAGTAT  
226 GATCTCCtctgctgctgctgctgCTTCTGGTAATGGCATTCAAGGAAGAGTTCATCAATCAGGCAAATAGCTCCAGTCCCTCAGCATT TTAGGCAATATC  
227 TGAAATTCAGCTCCACCAACATCCATTTTCATGACAACATAGTCATCTGCATTACAGTTTTTCATTAACCAATCTGCCAAATCCAAGACCTGAC  
228 TCTTTTCTGCTCAATCTCTATTCCATTCT  
229  
230  
231  
232

233 **Supplementary Figure S1. Neighbour joining tree.**

234

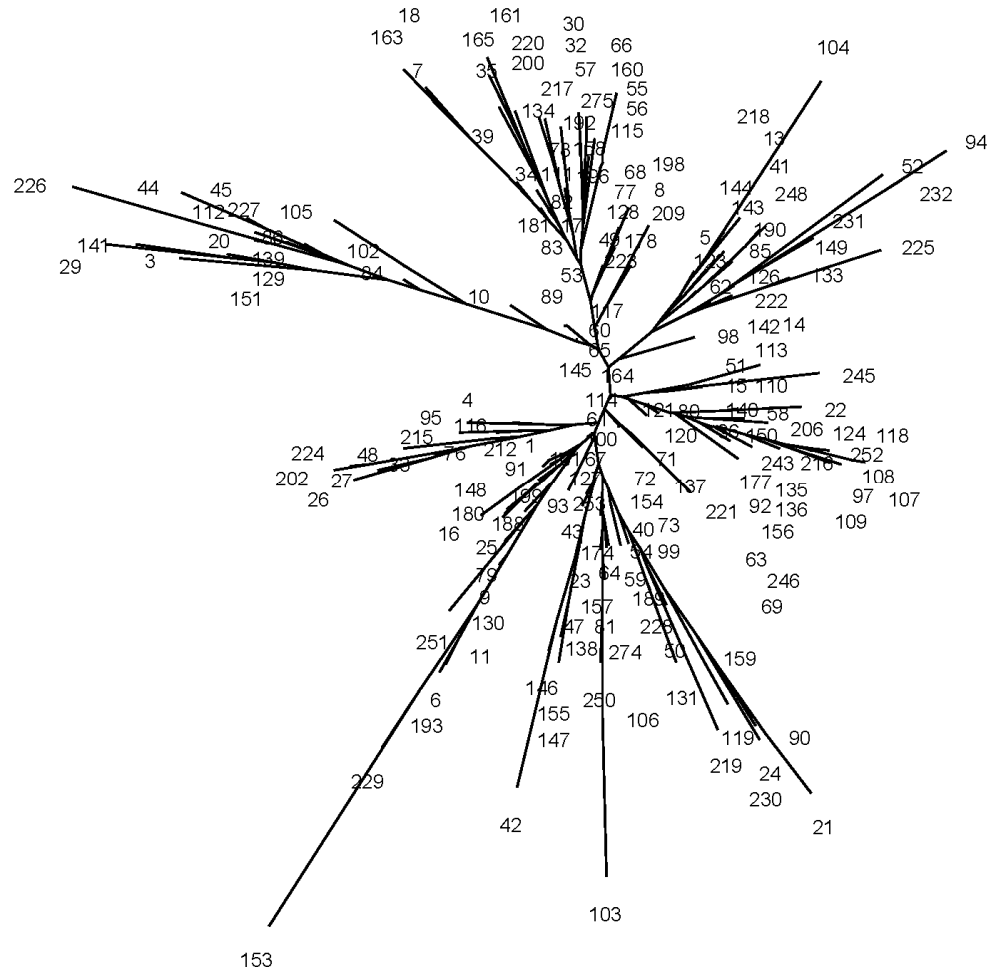

235

236 Phylogenetic relationship of *P. orientalis* individuals.
